# Supplementary material for: An HBV-encoded miRNA activates innate immunity to restrict HBV replication
Source: PubMed Central journal article supplement — J Mol Cell Biol. 2019 Dec 21;12(4):263–76. doi: 10.1093/jmcb/mjz104 (PMC7232129; doi:10.1093/jmcb/mjz104), 2019-12-21
Supplement: jmcb-2019-0217_r3_supplementary_material_mjz104.pdf [file jmcb-2019-0217_r3_supplementary_material_mjz104.pdf]

Supplementary Table 1: Primers and oligonucleotides used in this work.

| Usage                                  | Primer name          | Sequence (5'–3')                                      |
|----------------------------------------|----------------------|-------------------------------------------------------|
| RT-qPCR for<br>HBV-miR-3               | HBV-miR-3 RT         | GTCGTATCCAGTGCAGGGTCCGAGGTGCACTGGATACG<br>ACAAACGCCG  |
|                                        | HBV-miR-3 Forward    | TGCGGCTGGATGTGTCTGCGG                                 |
| RT-qPCR for<br>miR-16                  | miR-16 RT            | GTCGTATCCAGTGCAGGGTCCGAGGTGCACTGGATACG<br>ACCGCCAAT   |
|                                        | miR-16 Forward       | TGCGGTAGCAGCACGTAAATA                                 |
| RT-qPCR for<br>U6 snRNA                | U6 RT                | GTCGTATCCAGTGCAGGGTCCGAGGTGCACTGGATACG<br>ACAAAATATGG |
|                                        | U6 Forward           | TGCGGGTGCTCGCTTCGGCAGC                                |
|                                        | miRNA Reverse primer | CCAGTGCAGGGTCCGAGGT                                   |
| RT-qPCR for<br>$\beta$ -actin          | $\beta$ -actin-F     | CGTGACATTAAGGAGAAGCTG                                 |
|                                        | $\beta$ -actin-R     | CTAGAAGCATTTGCGGTGGAC                                 |
| RT-qPCR for<br>pgRNA/HBV<br>DNA copies | pgRNA-qRT-F          | TCTTGCCTTACTTTTGGAAG                                  |
|                                        | pgRNA-qRT-R          | AGTTCTTCTTCTAGGGGACC                                  |
| RT-qPCR for<br>total RNA               | total RNA-qRT-F      | CTCCCCGTCTGTGCCTTCTC                                  |
|                                        | total RNA-qRT-R      | TCGGTCGTTGACATTGCTGA                                  |
| RT-qPCR for<br>cccDNA                  | cccDNA - qPCR-F      | TGCACTTCGCTTCACCT                                     |
|                                        | cccDNA - qPCR - R    | AGGGGCATTTGGTGGTC                                     |
| RT-qPCR for<br>OAS-1                   | OAS-1-qRT-F          | GAAGGCAGCTCACGAAAC                                    |
|                                        | OAS-1-qRT-R          | TTCTTAAAGCATGGGTAATTC                                 |
| RT-qPCR for<br>MX1                     | MX1-qRT-F            | CACATGAGCTGGCGGGATT                                   |
|                                        | MX1-qRT-R            | AGCGATTCTGAGGGCTGAAA                                  |
| RT-qPCR for<br>IFIT2                   | IFIT2-qRT-F          | CGGAAAGCAGAGGAAATCAA                                  |
|                                        | IFIT2-qRT-R          | TGAAAGTTGCCATACCGAAG                                  |
| RT-qPCR for<br>IFIT3                   | IFIT3-qRT-F          | GCCGTTACAGGGAAATACTGG                                 |

|                  |              |                                    |
|------------------|--------------|------------------------------------|
|                  | IFIT3-qRT-R  | CCTCAACATCGGGGCTCT                 |
| RT-qPCR for      | EGFR-qRT-F   | GAGACGAGAACTGCCAGAA                |
| EGFR             |              |                                    |
|                  | EGFR-qRT-R   | GTAGCATTTATGGAGAGTC                |
| RT-qPCR for      | NOS2-qRT-F   | TTCAGTATCACAACCTCAGCAAG            |
| NOS2             |              |                                    |
|                  | NOS2-qRT-R   | TGGACCTGCAAGTTAAAATCCC             |
| RT-qPCR for      | KLF4-qRT-F   | CCCACATGAAGCGACTTCCC               |
| KLF4             |              |                                    |
|                  | KLF4-qRT-R   | CAGGTCCAGGAGATCGTTGAA              |
| RT-qPCR for      | MCP1-qRT-F   | CAGCCAGATGCA ATCAATGCC             |
| MCP1             |              |                                    |
|                  | MCP1-qRT-R   | TGGAATCCTGAACCCACTTCT              |
| RT-qPCR for      | Arg1-qRT-F   | CCAGTCCGTCAACATCAAAACT             |
| Arg1             |              |                                    |
|                  | Arg1-qRT-R   | CCAGTCCGTCAACATCAAAACT             |
| RT-qPCR for      | CD206-qRT-F  | GGGTTGCTATCAC TCTCTATGC            |
| CD206            |              |                                    |
|                  | CD206-qRT-R  | TTTCTTGCTGTTGCCGTAGTT              |
| RT-qPCR for      | CXCL10-qRT-F | GAAATTATTCCTGCAAGCCAATTT           |
| CXCL10           |              |                                    |
|                  | CXCL10-qRT-R | TCACCCTTCTTTTTCATTGTAGCA           |
| RT-qPCR for      | SOCS5-qRT-F  | CCTCCTTCGGCCTTCACCTA               |
| SOCS5            |              |                                    |
|                  | SOCS5-qRT-R  | TATAAAAT CGTGACCAATAGCAGGC         |
| RT-qPCR for      | IFR3-qRT-F   | GCTCTCTGACTCTTTCAACCTCTT           |
| IFR3             |              |                                    |
|                  | IFR3-qRT-R   | AATGCTGCTCTTTTCTCCTCTG             |
| Construction for | SOCS5-F      | CGCGGATCC ATGGATAAAGTGGGAAAAATG    |
| SOCS5            |              |                                    |
|                  | SOCS5-R      | GCTCACCTCGAGTTTGCCTTGACTGGTTCTCG   |
| Construction for | EGFR-F       | GCGGGTACCATGCGACCCTCCGGGACGGCC     |
| EGFR             |              |                                    |
|                  | EGFR-R       | GACGACCTCGAGGCTCCAATAAATTCAGTCTTTG |

|                                       |               |                                                                  |
|---------------------------------------|---------------|------------------------------------------------------------------|
| Construction for SOCS5 EGFP reporters | EGFP-SOCS5-S  | GATCCCAAAGTGTTTGAGAACTTCATCCAAGCTTG                              |
|                                       | EGFP-SOCS5-AS | AATTCAAGCTTGGATGAAGTTCTCAAACACTTTGG                              |
|                                       | EGFP-SOCS5-MS | GATCCCAAAGTGTTTGAGAACTTGGAGTAAGCTTG                              |
|                                       | EGFP-SOCS5-MA | AATTCAAGCTTACTCCAAGTTCTCAAACACTTTGG                              |
| Construction for shR-SOCS5            | shR-SOCS5-S   | GATCCGGAACAAGACTTGCACGAACTCGAGTTCGTGCA<br>AGTCTTGTTTCCTTTTTGA    |
|                                       | shR-SOCS5-AS  | AGCTTCAAAAAGGAACAAGACTTGCACGAACTCGAGTT<br>CGTGCAAGTCTTGTTCCG     |
| Construction for shR-EGFR             | shR-EGFR-S    | GATCCGCCACAAAGCAGTGAATTTATCTCGAGATAAATT<br>CACTGCTTTGTGGCTTTTTGA |
|                                       | shR-EGFR-AS   | AGCTTCAAAAAGCCACAAAGCAGTGAATTTATCTCGAG<br>ATAAATTCAGTCTTTGTGGCG  |

Supplementary Table 2. Detailed information of patients with hepatitis B included in the study.

| Specimen |        |     | Detection |          |              |              |                     |          |          |
|----------|--------|-----|-----------|----------|--------------|--------------|---------------------|----------|----------|
| No.      | sex    | age | phase     | date     | HBsAg(ng/ml) | HBeAg(ng/ml) | DNA ( copies/ml )   | ALT(U/L) | AST(U/L) |
| 1        | male   | 26  | acute     | 14.12.11 | 474.5        | 23.12        | 9.8*10 <sup>4</sup> | 95       | 87       |
| 2        | male   | 39  | acute     | 15.3.26  | 328.7        | 72.33        | 2.3*10 <sup>3</sup> | 35       | 26       |
| 3        | male   | 37  | acute     | 16.10.22 | 260          | 0.18         | <500                | 51       | 39       |
| 4        | female | 44  | acute     | 13.12.26 | 220.4        | 0.12         | 4.6*10 <sup>4</sup> | 24       | 23       |
| 5        | male   | 27  | acute     | 16.10.22 | 315.2        | 42.46        | 2.8*10 <sup>3</sup> | 40       | 30       |
| 6        | female | 52  | acute     | 17.7.8   | 223.7        | 0.13         | 2.3*10 <sup>5</sup> | 66       | 33       |
| 7        | male   | 33  | acute     | 15.11.15 | 176.5        | 0.12         | <500                | 22       | 23       |
| 8        | male   | 28  | acute     | 17.7.23  | 680.5        | 0.55         | 2.9*10 <sup>5</sup> | 26       | 87       |
| 9        | male   | 51  | acute     | 16.11.7  | 15730        | 155.5        | 6.5*10 <sup>5</sup> | 11       | 16       |
| 10       | female | 42  | acute     | 17.12.23 | 649.6        | 0.07         | 7.0*10 <sup>4</sup> | 21       | 24       |
| 11       | male   | 32  | acute     | 14.6.29  | 3111         | 12.19        | 1.7*10 <sup>4</sup> | 12       | 16       |
| 12       | male   | 42  | acute     | 15.11.7  | 93.67        | 0.16         | 4.5*10 <sup>3</sup> | 24       | 23       |
| 13       | female | 35  | acute     | 14.2.25  | 11786        | 9            | 4.6*10 <sup>2</sup> | 25       | 38       |
| 14       | male   | 27  | acute     | 17.3.28  | 1873         | 13.8         | 2.0*10 <sup>3</sup> | 15       | 45       |
| 15       | female | 37  | acute     | 14.1.16  | 294.9        | 61.67        | 1.7*10 <sup>4</sup> | 11       | 16       |
| 16       | male   | 46  | acute     | 16.2.6   | 350          | 87.56        | 1.3*10 <sup>6</sup> | 22       | 23       |
| 17       | female | 46  | acute     | 13.11.2  | 463.7        | 0.33         | <500                | 25       | 38       |
| 18       | female | 39  | acute     | 15.11.30 | 461.4        | 283.6        | 1.8*10 <sup>6</sup> | 35       | 26       |
| 19       | male   | 34  | acute     | 14.1.18  | 342.2        | 264.6        | 4.9*10 <sup>3</sup> | 26       | 19       |
| 20       | female | 42  | acute     | 16.2.14  | 79.49        | 0.08         | 1.4*10 <sup>4</sup> | 15       | 18       |
